# Supplementary material
Source: PubMed Central journal article supplement (PMC4966435)
Supplement: JB.00322-16_zjb999094140so1.pdf [file JB.00322-16_zjb999094140so1.pdf]

**Supplementary Table S1. RMSD in angstroms for alignment of single chains**

|      |   | 4MAL | 4MBQ |      |      |      |      |      |
|------|---|------|------|------|------|------|------|------|
|      |   | B    | A    | B    | C    | D    | E    | F    |
| 4MAL | A | 0.28 | 0.23 | 0.33 | 0.38 | 0.38 | 0.46 | 0.54 |
| 4MBQ | A | 0.43 | 0.0  | 0.35 | 0.29 | 0.21 | 0.56 | 0.64 |

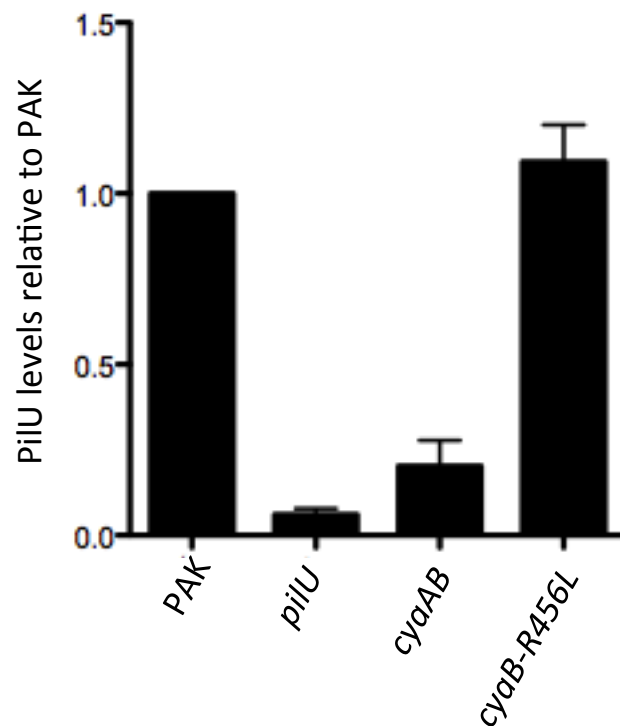

**Figure S1. PilU levels are positively correlated with cAMP levels**

Levels of PilU were determined by preparing cell lysates as described in the Methods, of wild type PAK, *pilU*, a mutant lacking the major adenylate cyclases (*cyaAB*), and a point mutant encoding a constitutively active adenylate cyclase (*cyaB-R456L*) grown overnight on LB 1.5% agar. Samples were resolved by SDS-PAGE and transferred to a nitrocellulose membrane. PilU was visualized by immunoblotting with anti-PilU antiserum. Densitometric analysis (average of n = 3) was carried out using ImageJ, normalizing band intensity of the PilU band to a nonspecific control band, and shown as a percentage of the normalized band intensity of wild type  $\pm$  standard error.
